# Supplementary material for: Time trends in municipal distribution patterns of cancer mortality in Spain
Source: PubMed Central journal article supplement (PMC4124154; doi:10.1186/1471-2407-14-535), 2014-07-24

Supplementary material of the article: **Time trends in municipal distribution patterns of cancer mortality in Spain.**

Supplementary material includes the following information: 1) Probability density functions showing distribution of smoothed relative risks used in each map and 2) Plots showing the evolution of the variance of model spatial and heterogeneity components and the proportion of the mortality relative risk variance explained by the spatial structure of the models.

**Figure-s1. Probability density functions showing distribution of smoothed relative risks used in each map**

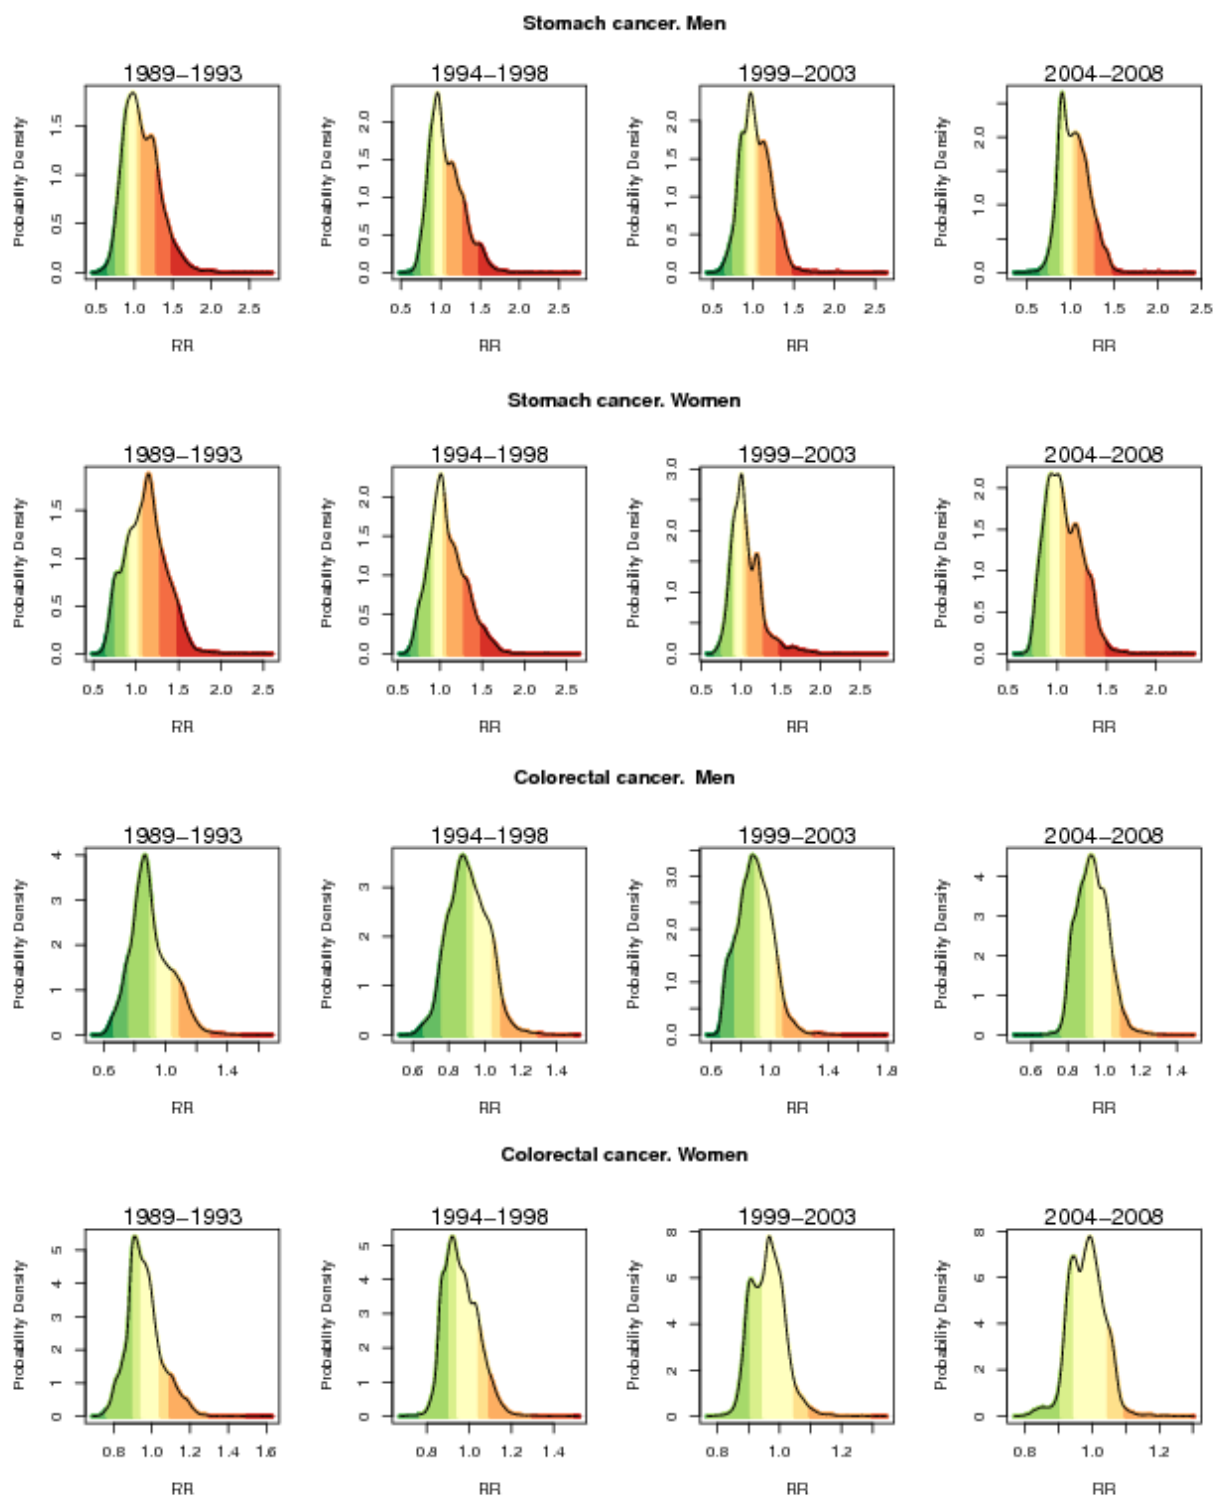

### Lung cancer. Men

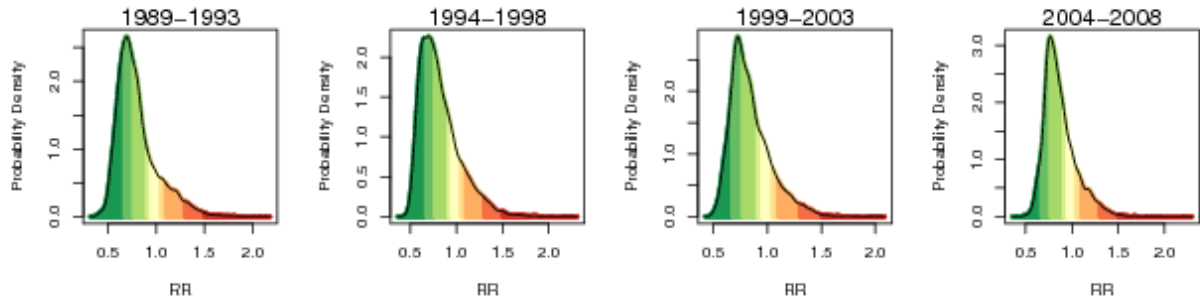

### Lung cancer. Women

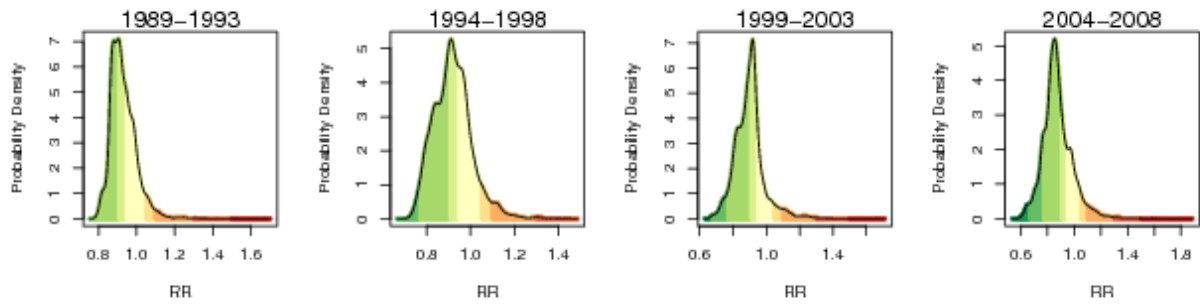

### Breast cancer. Women

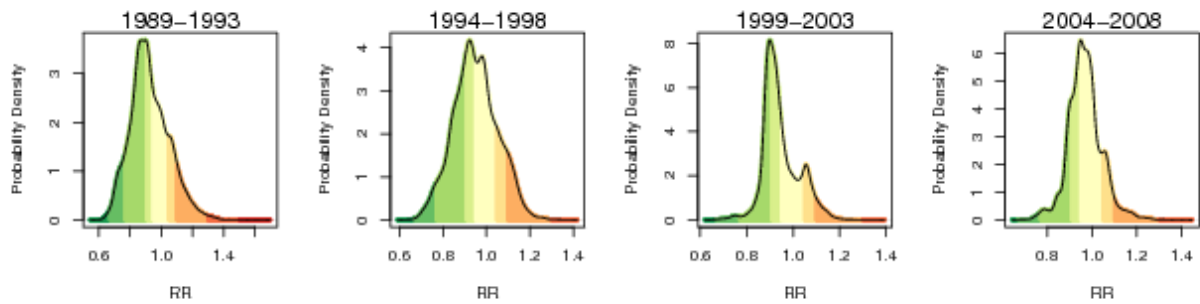

### Prostate cancer

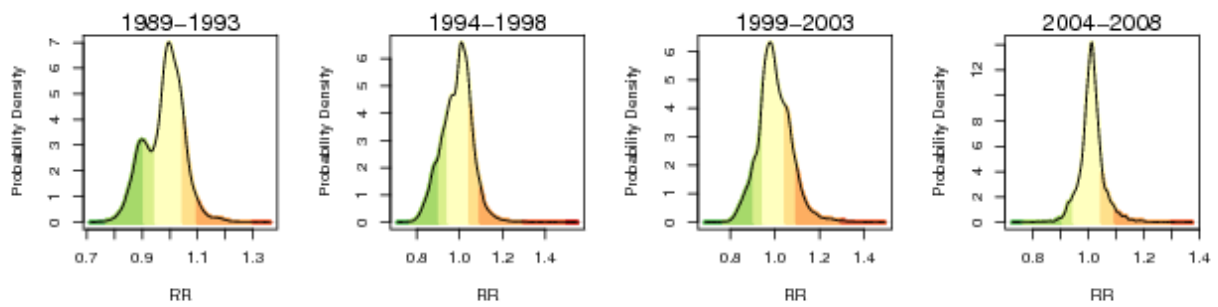

**Bladder cancer. Men**

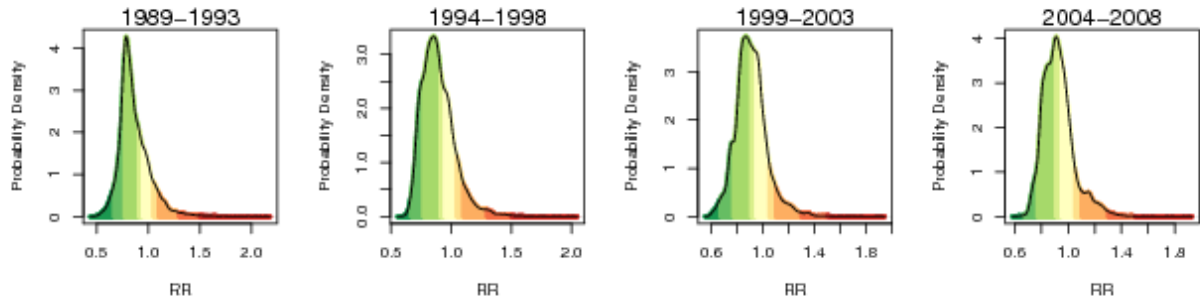

**Bladder cancer. Women**

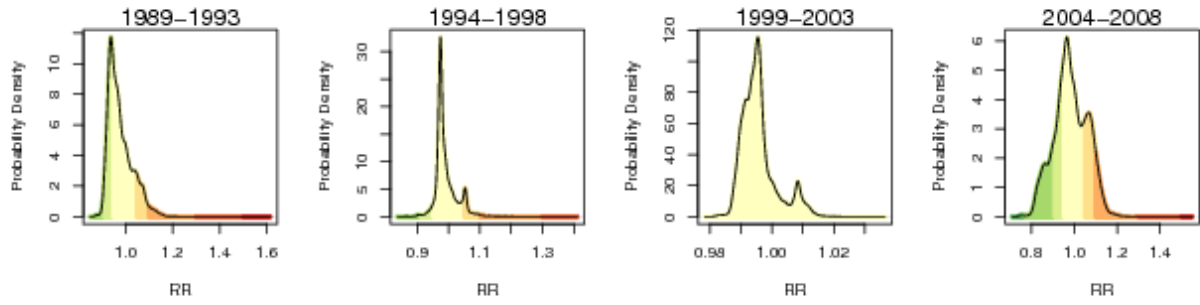

**Figura-s2.** Plots showing the evolution of the variance of model spatial and heterogeneity components and the proportion of the mortality relative risk variance explained by the spatial structure of the models.

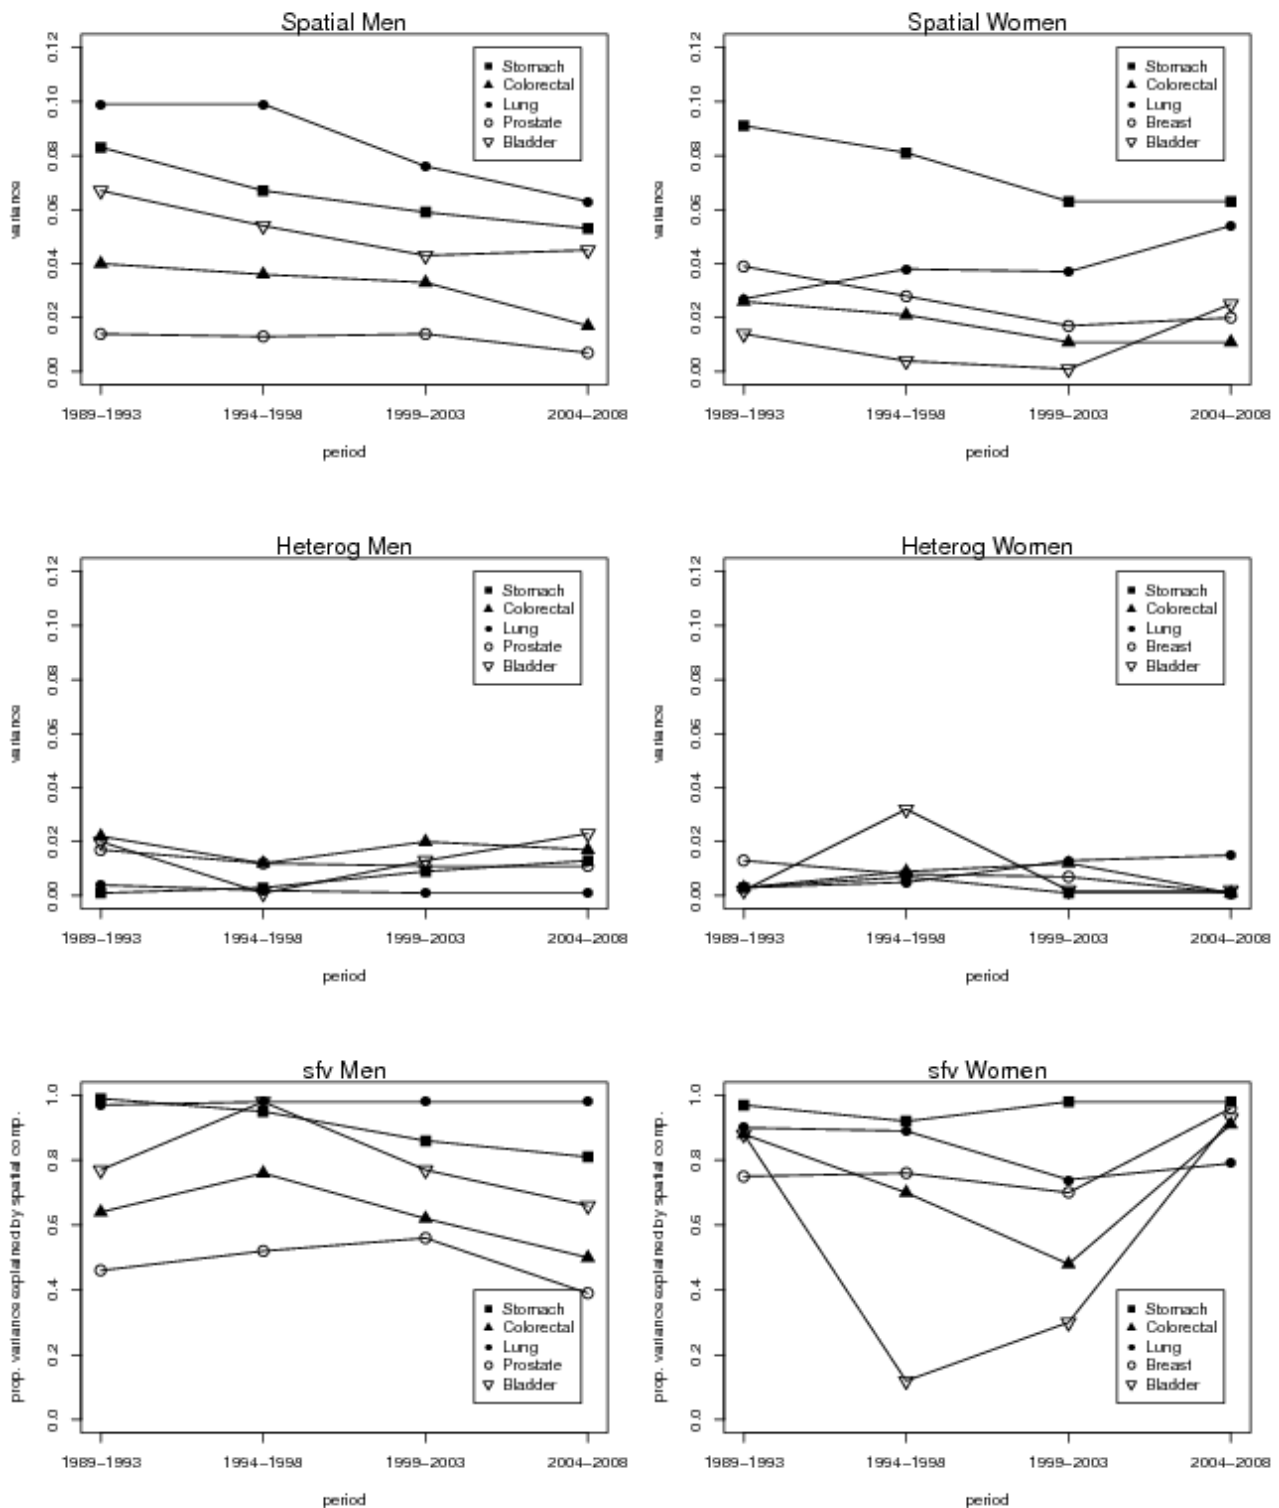

Supplement: 12885_2014_4728_MOESM1_ESM.pdf [file 12885_2014_4728_MOESM1_ESM.pdf]
